# Supplementary figures and images for: Translating Virtual Prey-Predator Interaction to Real-World Robotic Environments: Enabling Multimodal Sensing and Evolutionary Dynamics
Source: MDPI journal article supplement (doi:10.3390/biomimetics8080580), 2023-12-01

Real Robot Experiment with Arena Length  $L = 800$  and Odor Width  $\Phi_w = 100$

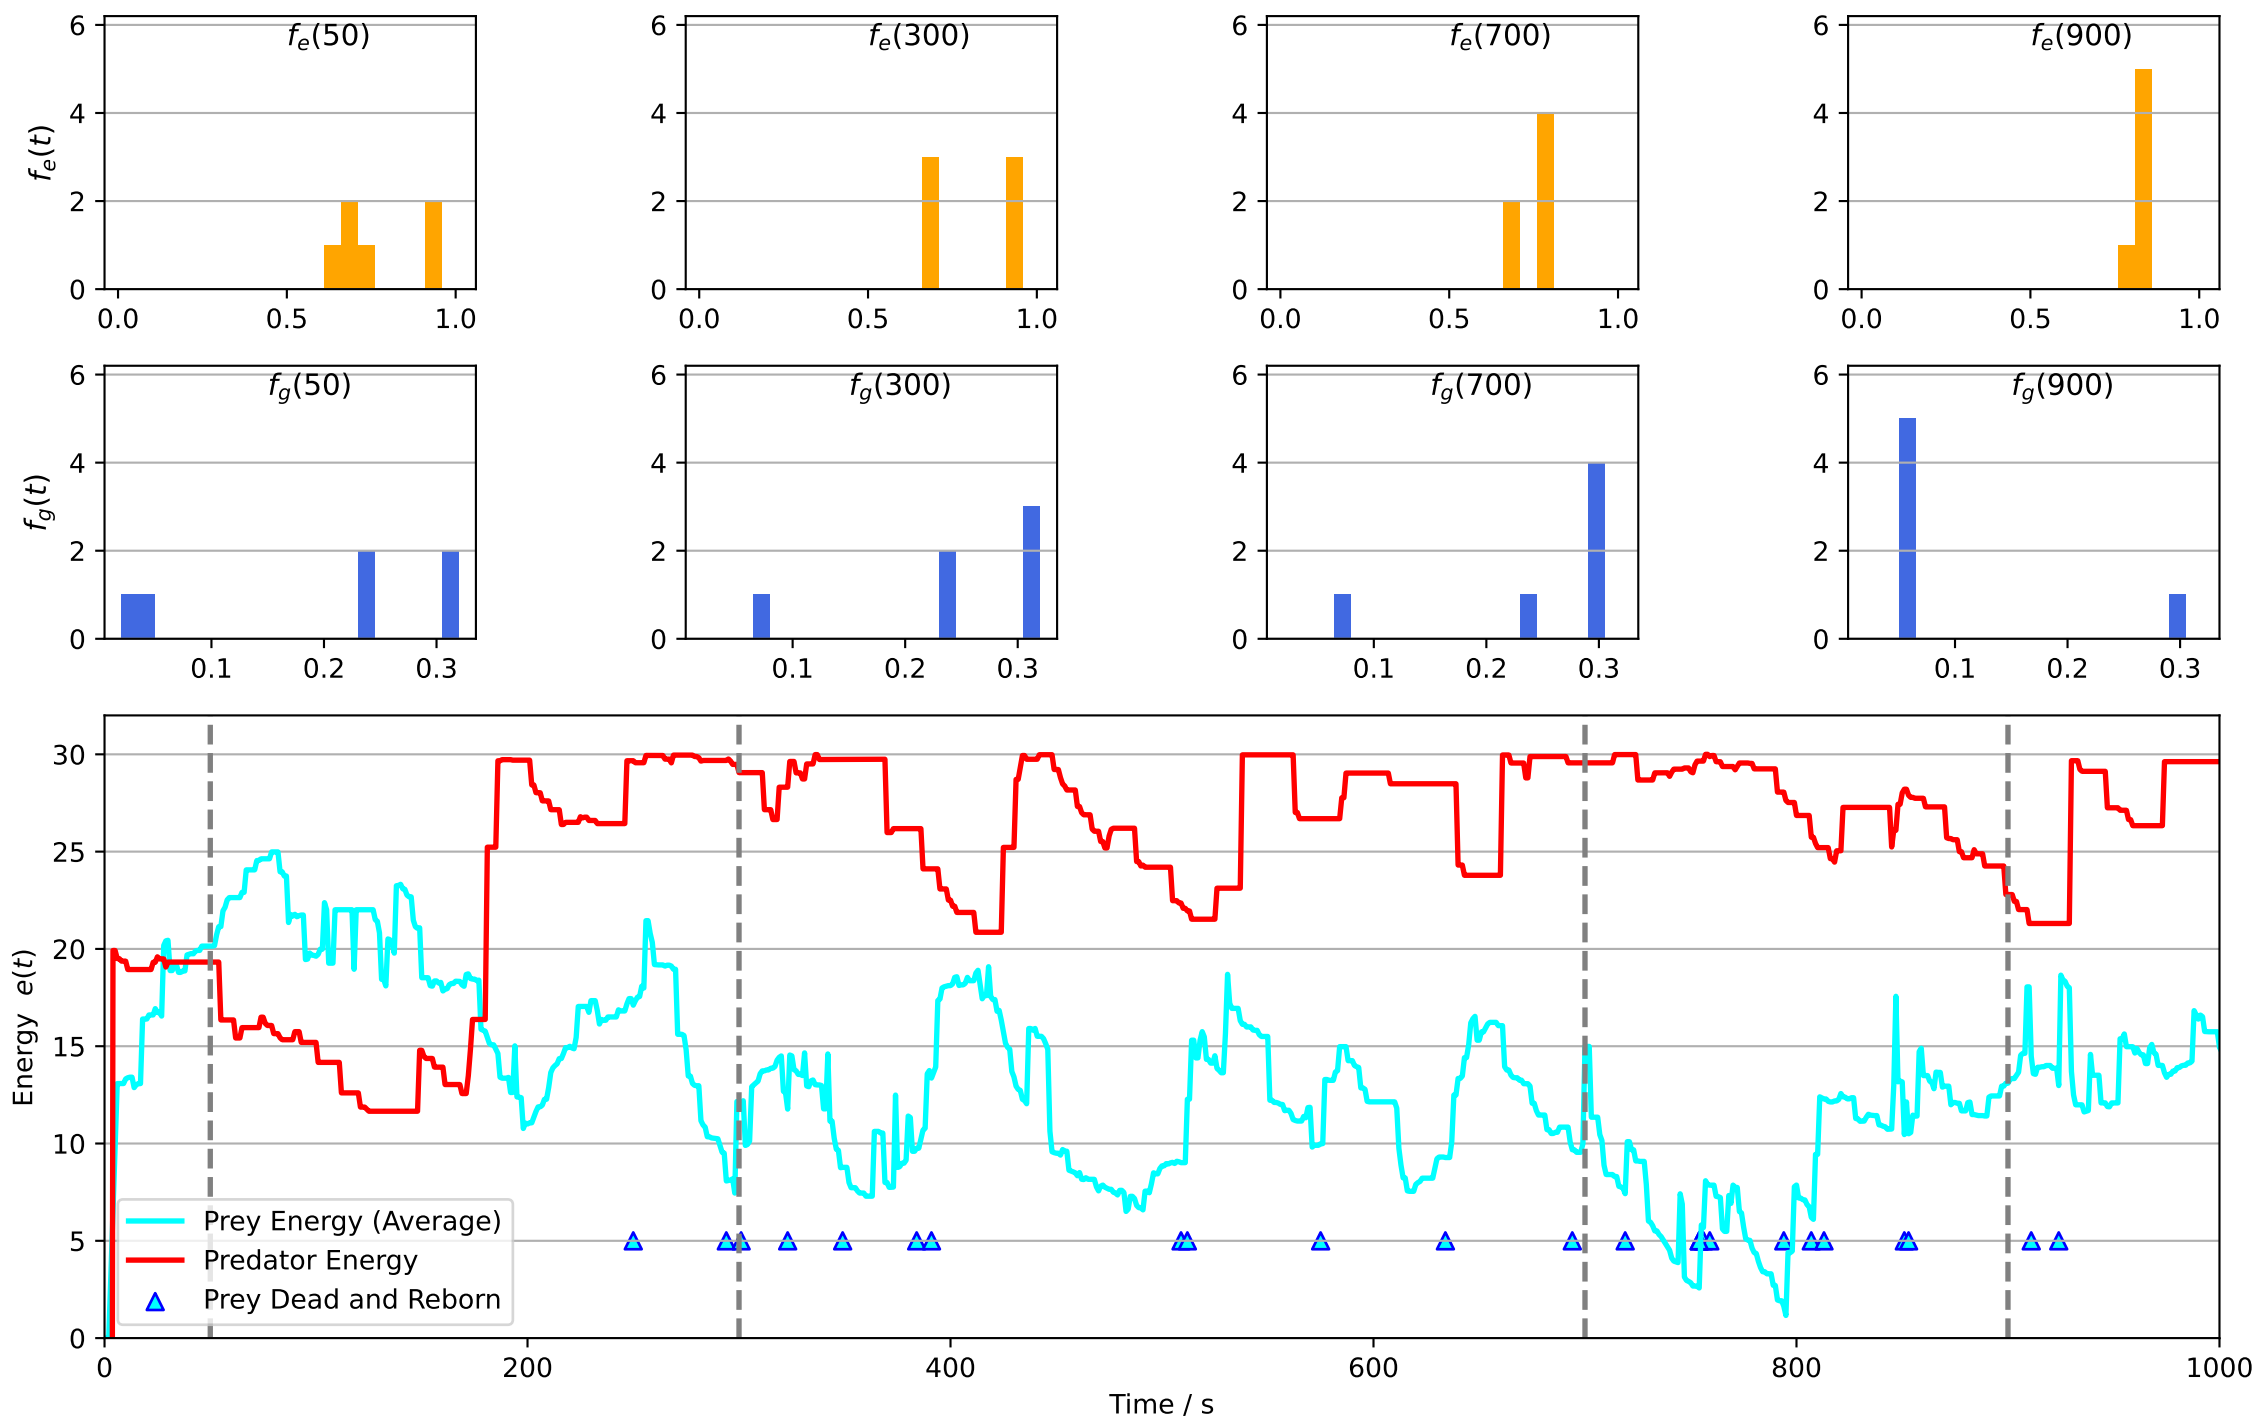

Supplement: s1 [file s1]

Real Robot Experiment with Arena Length  $L = 1200$  and Odor Width  $\Phi_w = 100$

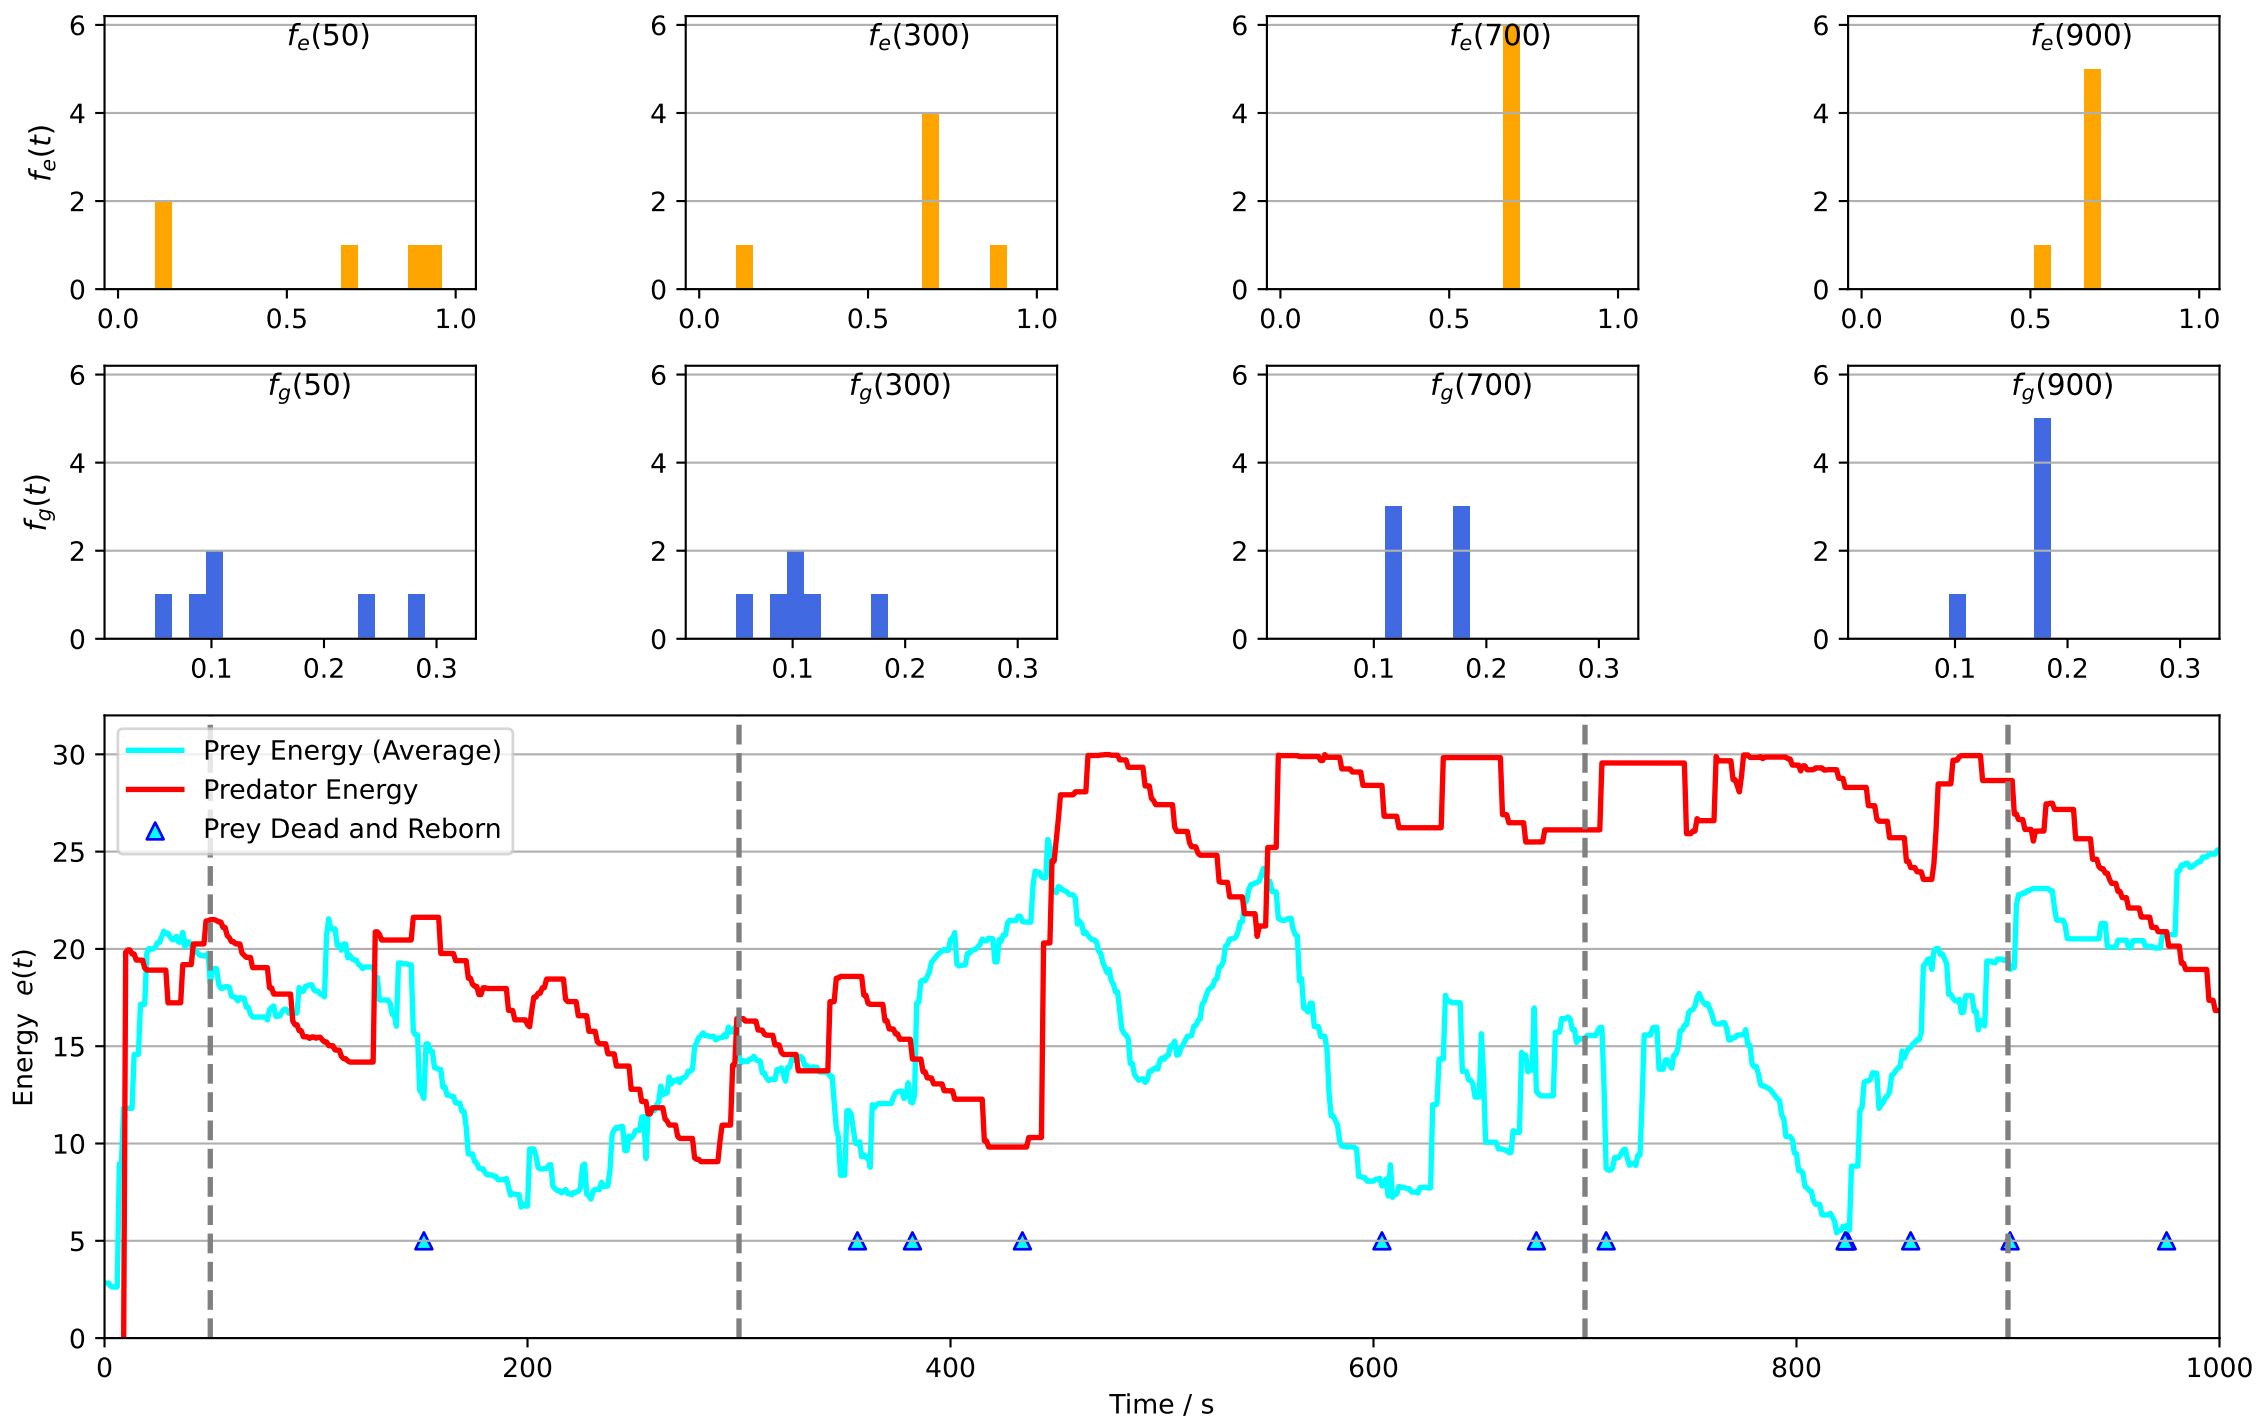

Supplement: s1 [file s1]

Real Robot Experiment with Arena Length  $L = 1200$  and Odor Width  $\Phi_w = 80$

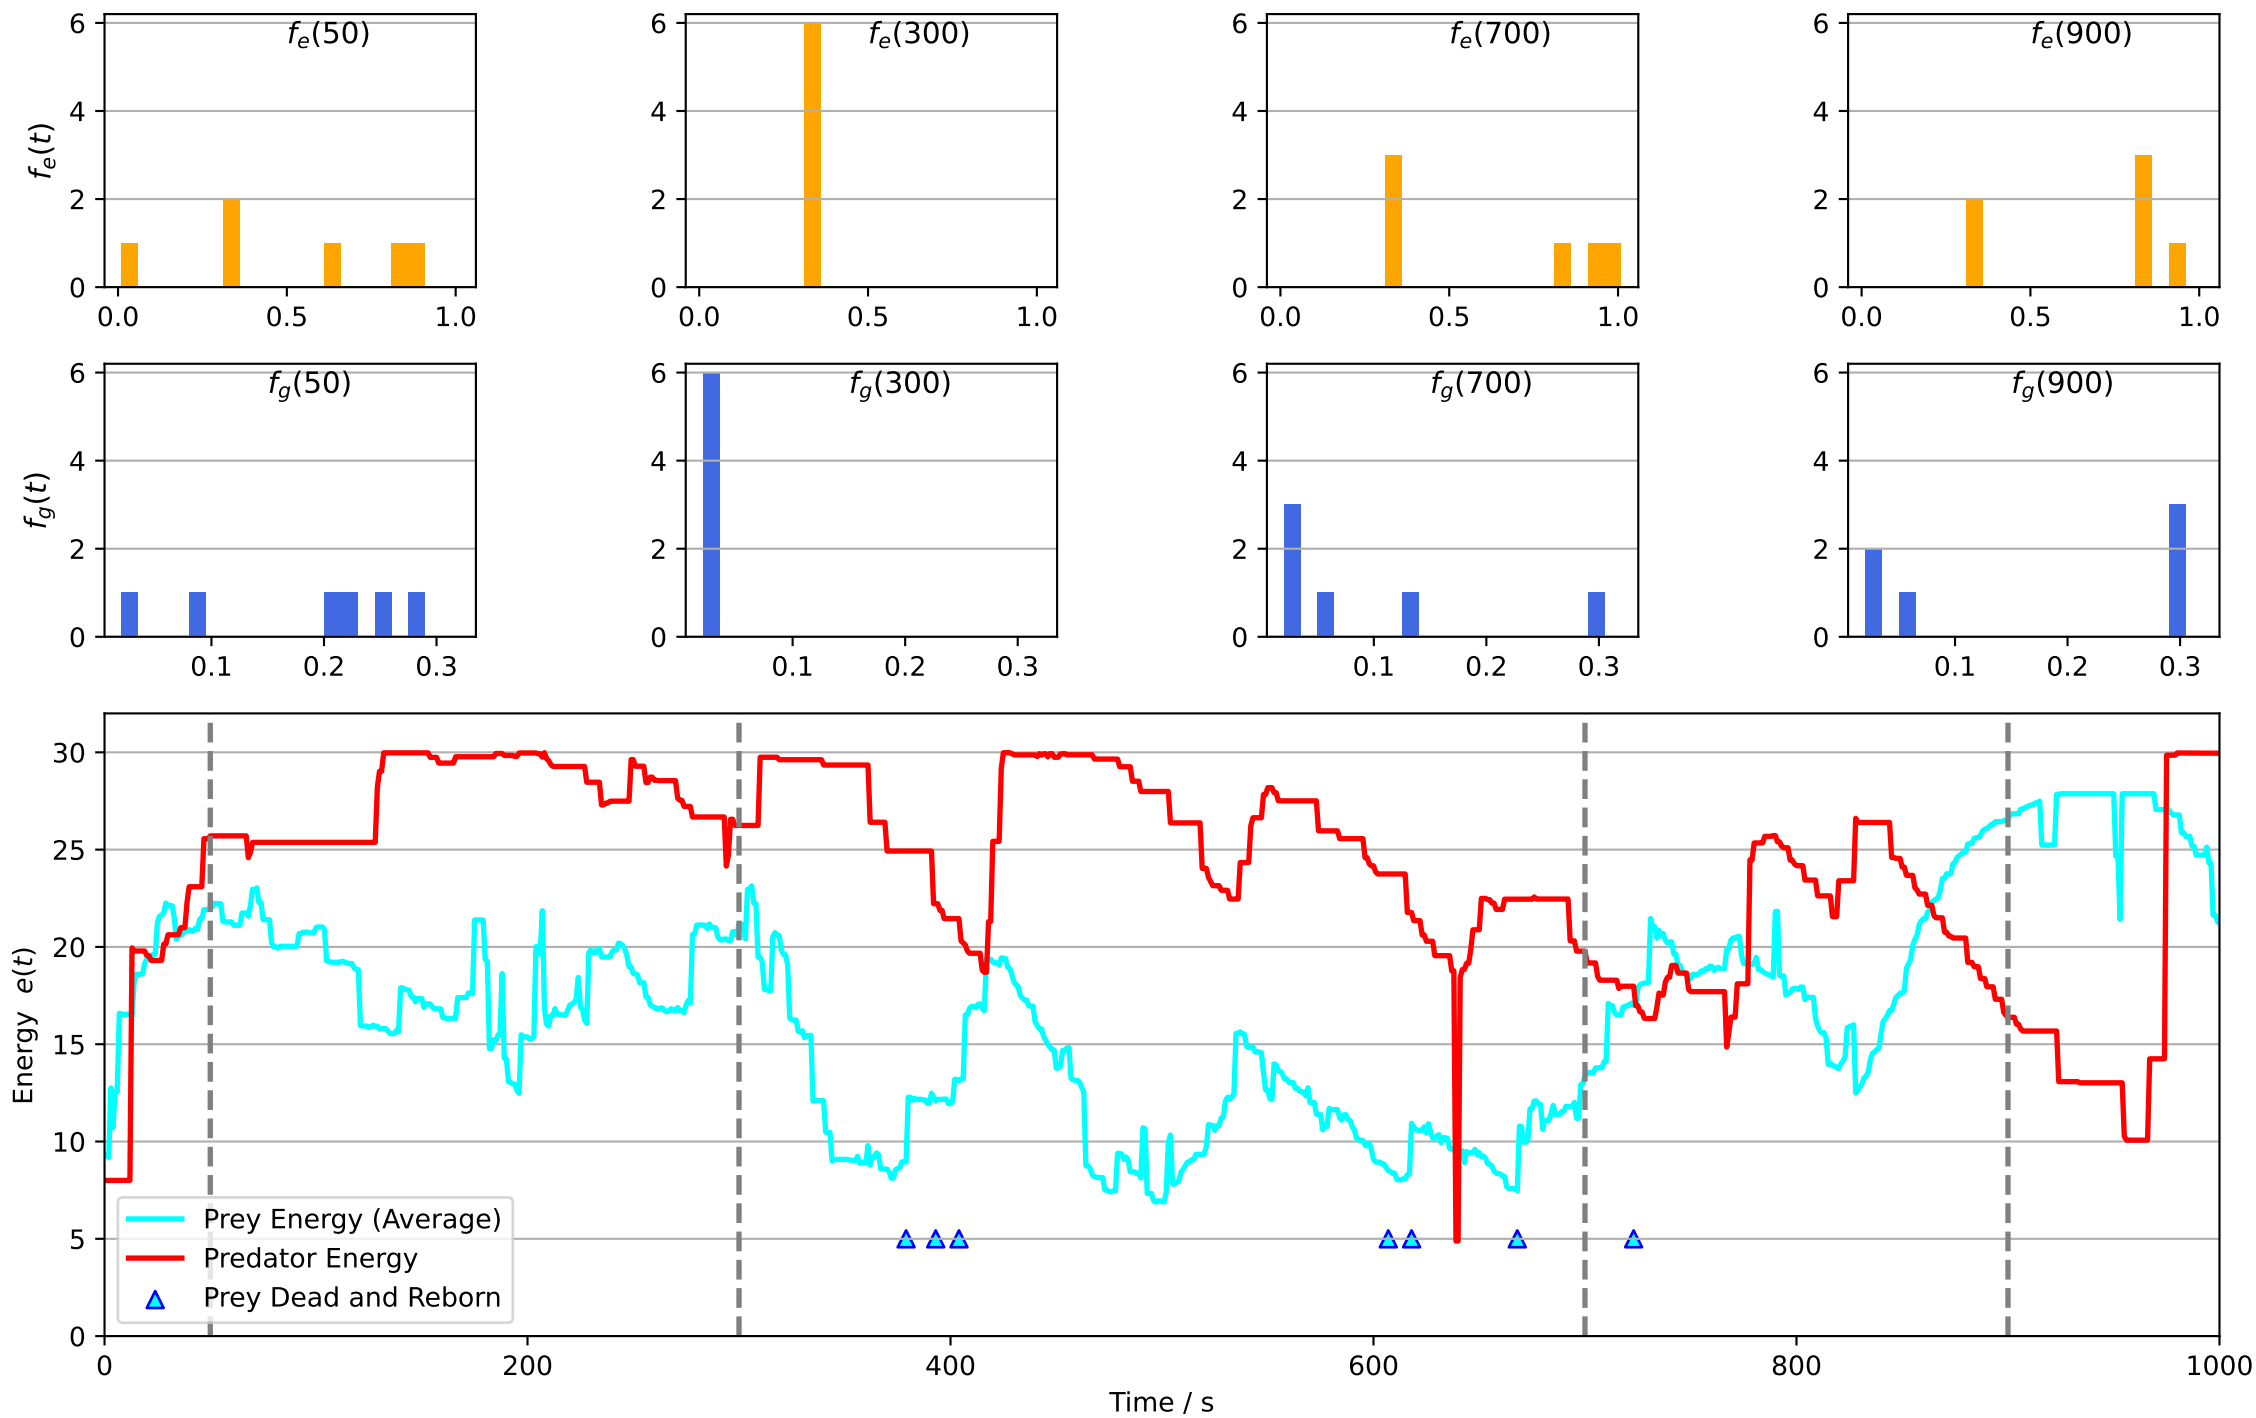

Supplement: s1 [file s1]
